# Supplementary material
Source: PubMed Central journal article supplement (PMC2799342)
Supplement: pp.109.150425_1.pdf [file pp.109.150425_1.pdf]

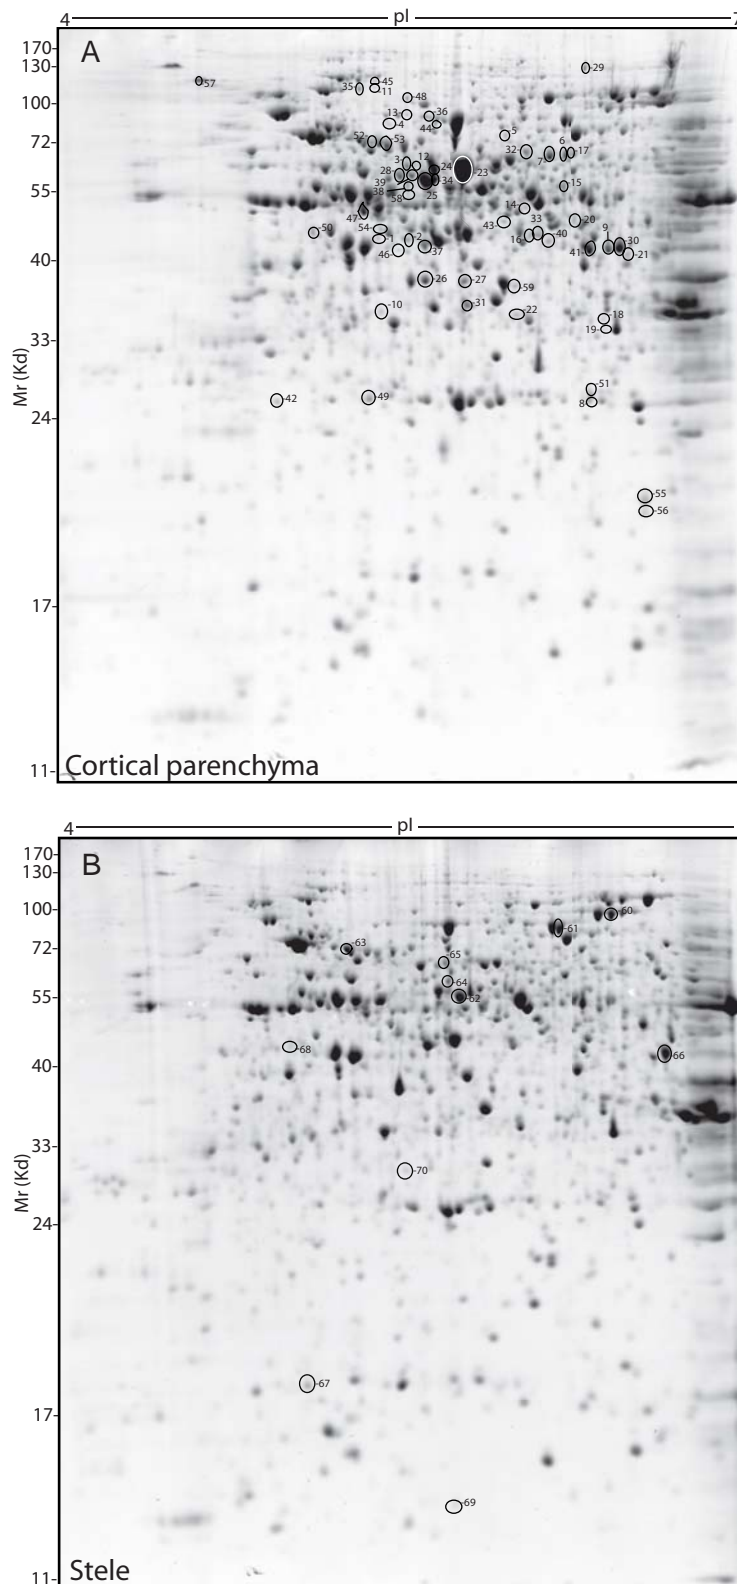

**Fig. S1:** Representative proteomic 2-DE maps of soluble proteins extracted from 2.5 d cortical parenchyma (A) and stele (B) tissues from the differentiation zone of maize primary roots. First dimension isoelectric focusing of the protein extracts was performed on IPG strips pH 4-7. In the second dimension proteins were separated according to their molecular masses on 12.5% SDS-PAGE gels. Proteins were stained with colloidal Coomassie blue. Proteins that were differentially displayed between the two genotypes are encircled and numbered on the gels. The mass spectrometric identification of these proteins is summarized in Tables I and II and online supplementary Table S1.

**Table S1.** Peptide fragments identified via ESI MS/MS and summarized in Tables 1& 2

| Spot No. | Protein ID | Peptide No. | Matched peptide sequences                 |
|----------|------------|-------------|-------------------------------------------|
| 1        | AAY26523   | 1           | VVLAPM <sup>Ox</sup> TR                   |
|          |            | 2           | M <sup>Ox</sup> AIVDDRR                   |
|          |            | 3           | M <sup>Ox</sup> GQLELSHR                  |
|          |            | 4           | LFLANPDLPK                                |
|          |            | 5           | ADEYGGSVENR                               |
| 2        | AAY26523   | 1           | VVLAPM <sup>Ox</sup> TR                   |
|          |            | 2           | M <sup>Ox</sup> AIVDDRR                   |
|          |            | 3           | M <sup>Ox</sup> GQLELSHR                  |
|          |            | 4           | LFLANPDLPK                                |
|          |            | 5           | ADEYGGSVENR                               |
|          |            | 6           | RFEVDEILNK                                |
|          |            | 7           | DGANDRADEYGGSVENR                         |
| 3        | P49235     | 1           | LLKEM <sup>Ox</sup> GM <sup>Ox</sup> DAYR |
|          |            | 2           | EGGINPDGIK                                |
|          |            | 3           | SIVEDYTYFAK                               |
|          |            | 4           | VC <sup>CAMe</sup> FDNFGDK                |
|          |            | 5           | VC <sup>CAMe</sup> FDNFGDKVK              |
|          |            | 6           | IGLAFDVM <sup>Ox</sup> GR                 |
|          |            | 7           | VPYGTSFLDK                                |
|          |            | 8           | GDYPFSM <sup>Ox</sup> R                   |
|          |            | 9           | ERLPFFK                                   |
|          |            | 10          | LPFFKDEQK                                 |
|          |            | 11          | DLLM <sup>Ox</sup> IM <sup>Ox</sup> K     |
|          |            | 12          | ETPLPM <sup>Ox</sup> EAALNDYK             |
|          |            | 13          | ETPLPM <sup>Ox</sup> EAALNDYKR            |

| Spot No.  | Protein ID | Peptide No. | Matched peptide sequences                     |
|-----------|------------|-------------|-----------------------------------------------|
| 3 (cont.) | P49235     | 14          | YGIVYVDR                                      |
| 4         | AAT70081   | 1           | APDLLYR                                       |
|           |            | 2           | YDFQQR                                        |
|           |            | 3           | ELEHIEK                                       |
|           |            | 4           | LVVGM <sup>Ox</sup> PFK                       |
|           |            | 5           | VFSPLVEK                                      |
|           |            | 6           | VNPGNFADR                                     |
|           |            | 7           | EGEEVDYR                                      |
|           |            | 8           | IADKGADLVR                                    |
|           |            | 9           | VNPGNFADRR                                    |
|           |            | 10          | IM <sup>Ox</sup> SYYGDSR                      |
|           |            | 11          | GM <sup>Ox</sup> VESALEFAR                    |
|           |            | 12          | ELPPVEDAEAR                                   |
|           |            | 13          | ASNPVIM <sup>Ox</sup> VQAYR                   |
|           |            | 14          | DGSVLM <sup>Ox</sup> SVSLDQLK                 |
|           |            | 15          | IQTM <sup>Ox</sup> TTSQTKDVAK                 |
|           |            | 16          | VAEC <sup>CAMe</sup> FDK                      |
|           |            | 17          | EADAC <sup>CAMe</sup> FEIK                    |
|           |            | 18          | VAEC <sup>CAMe</sup> FDKIR                    |
|           |            | 19          | KEADAC <sup>CAMe</sup> FEIK                   |
|           |            | 20          | DTSFNLLQGC <sup>CAMe</sup> R                  |
|           |            | 21          | TEYVSC <sup>CAMe</sup> PSC <sup>CAMe</sup> GR |
| 5         | ABG22500   | 1           | EEFGQIPR                                      |
|           |            | 2           | IDYQDRDTR                                     |
|           |            | 3           | ELEVVWR                                       |
|           |            | 4           | LIHYVNK                                       |

| Spot No.  | Protein ID   | Peptide No. | Matched peptide sequences                                    |
|-----------|--------------|-------------|--------------------------------------------------------------|
| 5 (cont.) | ABG22500     | 5           | LIHYVNKDGR                                                   |
|           |              | 6           | QLEFFK                                                       |
| 6         | CAA12157     | 1           | GLSFTEKER                                                    |
|           |              | 2           | YTALM <sup>Ox</sup> DLQER                                    |
|           |              | 3           | SIQIVVTDGER                                                  |
|           |              | 4           | QANVSVEEAR                                                   |
|           |              | 5           | EETLQPFK                                                     |
|           |              | 6           | KISANIAAHVAAK                                                |
| 7         | P49094       | 1           | EAYYYR                                                       |
|           |              | 2           | LFPQDSAR                                                     |
|           |              | 3           | ASTPM <sup>Ox</sup> FLMSR                                    |
|           |              | 4           | AFDDDEHPYLPK                                                 |
|           |              | 5           | KAFDDDEHPYLPK                                                |
| 8         | NP_001058303 | 1           | LAYTEM <sup>Ox</sup> AR                                      |
|           |              | 2           | GLTVGIVSNAEYR                                                |
|           |              | 3           | TADAESWR                                                     |
| 9         | AAB51595     | 1           | SLLIPFR                                                      |
|           |              | 2           | TAVANIPYGGAK                                                 |
|           |              | 3           | VIAISDVTGAVK                                                 |
|           |              | 4           | M <sup>Ox</sup> GAFTLGVNR                                    |
| 10        | EAZ15034     | 1           | LEIM <sup>Ox</sup> EPC <sup>CAMe</sup> C <sup>CAMe</sup> SVK |
|           |              | 2           | AFGAELVLTDAAK                                                |
|           |              | 3           | IQGIGAGFVPR                                                  |
| 11        | AAA33498     | 1           | TM <sup>Ox</sup> KELLGGK                                     |
|           |              | 2           | GEPFSPDPKK                                                   |
|           |              | 3           | SINQITGLR                                                    |

| Spot No.   | Protein ID   | Peptide No. | Matched peptide sequences                 |
|------------|--------------|-------------|-------------------------------------------|
| 11 (cont.) | AAA33498     | 4           | LVTIGGHVLR                                |
|            |              | 5           | TEHM <sup>Ox</sup> FFASDER                |
|            |              | 6           | SDFEGIFR                                  |
|            |              | 7           | AM <sup>Ox</sup> DGLPVTIR                 |
|            |              | 8           | VGTM <sup>Ox</sup> IEIPR                  |
| 12         | P49235       | 1           | LLKEM <sup>Ox</sup> GM <sup>Ox</sup> DAYR |
|            |              | 2           | EGGINPDGIK                                |
|            |              | 3           | YGGFLDKSHK                                |
|            |              | 4           | VC <sup>CAMe</sup> FDNFGDK                |
|            |              | 5           | VC <sup>CAMe</sup> FDNFGDKVK              |
|            |              | 6           | IGLAFDVM <sup>Ox</sup> GR                 |
|            |              | 7           | VPYGTSFLDK                                |
|            |              | 8           | GDYPFSM <sup>Ox</sup> R                   |
|            |              | 9           | YGIVYVDR                                  |
| 13         | NP_001046995 | 1           | TNIC <sup>CAMe</sup> YNAVDR               |
|            |              | 2           | VC <sup>CAMe</sup> QLANYLK                |
|            |              | 3           | LVITC <sup>CAMe</sup> NAVK                |
|            |              | 4           | VDDVINVSGHR                               |
| 14         | NP_001045689 | 1           | LDLLLSQGK                                 |
|            |              | 2           | ILNHLIHK                                  |
|            |              | 3           | VLQLETAAGAAIR                             |
|            |              | 4           | GKVTITAQPGVK                              |
|            |              | 5           | VTITAQPGVK                                |
| 15         | Q9ZTP4       | 1           | VGADNLLVK                                 |
|            |              | 2           | EHTHTFVNK                                 |
|            |              | 3           | GGTIGELDFR                                |

| Spot No.   | Protein ID   | Peptide No. | Matched peptide sequences    |
|------------|--------------|-------------|------------------------------|
| 15 (cont.) | Q9ZTP4       | 4           | NAVALALSPVVR                 |
|            |              | 5           | ALVDPDGALQQVR                |
|            |              | 6           | GSPDVYLSGPIKK                |
|            |              | 7           | SPDGETYVK                    |
|            |              | 8           | QVVELFPSSR                   |
|            |              | 9           | IGQSLYR                      |
|            |              | 10          | ALGNVQVLQAS                  |
| 16         | ABA97759     | 1           | TLDEYYR                      |
|            |              | 2           | LGADFLVASSHK                 |
|            |              | 3           | STYAEPPSR                    |
|            |              | 4           | SGHHC <sup>CAMe</sup> AQILHR |
|            |              | 5           | TLGINASAR                    |
|            |              | 6           | ASLHFYNTK                    |
| 17         | NP_001047770 | 1           | GAAQAIRPVSK                  |
|            |              | 2           | KM <sup>Ox</sup> AFVVLK      |
|            |              | 3           | M <sup>Ox</sup> AFVVLK       |
|            |              | 4           | ATTQQVEIQVR                  |
|            |              | 5           | ELETINR                      |
|            |              | 6           | GEEIISGAQR                   |
|            |              | 7           | KTSLFPR                      |
| 18         | ABF61890     | 1           | HFVLNTGAK                    |
|            |              | 2           | EIGLALKK                     |
|            |              | 3           | KLFEEGVVK                    |
|            |              | 4           | LFEEGVVK                     |
|            |              | 5           | LFEEGVVKR                    |
|            |              | 6           | REDLFITSK                    |

| Spot No.   | Protein ID | Peptide No. | Matched peptide sequences      |
|------------|------------|-------------|--------------------------------|
| 18 (cont.) | ABF61890   | 7           | EDLFITSK                       |
|            |            | 8           | AIGVSNFSSK                     |
|            |            | 9           | KLGDLLAVAR                     |
|            |            | 10          | LGDLLAVAR                      |
|            |            | 11          | EPIIISIAEK                     |
|            |            | 12          | TSAQVALR                       |
| 19         | EAZ02455   | 1           | VGLAQM <sup>Ox</sup> LR        |
|            |            | 2           | GGVIM <sup>Ox</sup> DVVTPEQAR  |
|            |            | 3           | M <sup>Ox</sup> SDPGLIR        |
|            |            | 4           | AVTIPVM <sup>Ox</sup> AK       |
|            |            | 5           | VPFVCCAMeGC <sup>CAMeR</sup>   |
|            |            | 6           | TKGEAGTGNVVEAVR                |
|            |            | 7           | GEAGTGNVVEAVR                  |
|            |            | 8           | IAAPYDLVM <sup>Ox</sup> QTK    |
| 20         | AAY26521   | 1           | M <sup>Ox</sup> GQFELSHR       |
|            |            | 2           | QISPDAESGTAYSKPR               |
|            |            | 3           | TDQYGGLENR                     |
|            |            | 4           | LAVEVVDVVR                     |
|            |            | 5           | LFLANPDLPR                     |
| 21         | BAA23815   | 1           | VNVGVGAYR                      |
|            |            | 2           | M <sup>Ox</sup> IEESLK         |
|            |            | 3           | IAAVQALSGTGAC <sup>CAMeR</sup> |
|            |            | 4           | LFADFQKR                       |
|            |            | 5           | EISHQFK                        |
|            |            | 6           | NM <sup>Ox</sup> GLYGQR        |
| 22         | EAY75934   | 1           | LGGAITNK                       |

| Spot No.   | Protein ID | Peptide No. | Matched peptide sequences                 |
|------------|------------|-------------|-------------------------------------------|
| 22 (cont.) | EAY75934   | 2           | GGLHSTLVK                                 |
|            |            | 3           | ISVTSLNQEIVR                              |
|            |            | 4           | HLAQLLSPK                                 |
|            |            | 5           | GVEISVAAHDTTGGM <sup>Ox</sup> ETK         |
| 23         | P49235     | 1           | VGSQNGVQM <sup>Ox</sup> LSPSEIPQR         |
|            |            | 2           | GESNWDHFC <sup>CAMe</sup> HNHPER          |
|            |            | 3           | ILDGSNSDIGANSYHM <sup>Ox</sup> YK         |
|            |            | 4           | ILDGSNSDIGANSYHMYK                        |
|            |            | 5           | LLKEM <sup>Ox</sup> GM <sup>Ox</sup> DAYR |
|            |            | 6           | EMGMDAYR                                  |
|            |            | 7           | FSISWPR                                   |
|            |            | 8           | EGGINPDGIK                                |
|            |            | 9           | SIVEDYTYFAK                               |
|            |            | 10          | VC <sup>CAMe</sup> FDNFGDK                |
|            |            | 11          | VC <sup>CAMe</sup> FDNFGDKVK              |
|            |            | 12          | IGLAFDVMGR                                |
|            |            | 13          | VPYGTSFLDK                                |
|            |            | 14          | VPYGTSFLDKQAEER                           |
|            |            | 15          | GDYPFSMR                                  |
|            |            | 16          | ERLPFFK                                   |
|            |            | 17          | LPFFKDEQK                                 |
|            |            | 18          | LAGSYNM <sup>Ox</sup> LGLNYYTSR           |
|            |            | 19          | DLLMIMK                                   |
|            |            | 20          | ETPLPM <sup>Ox</sup> EAALNDYK             |
|            |            | 21          | ETPLPM <sup>Ox</sup> EAALNDYKR            |
|            |            | 22          | RLDYIQR                                   |



| Spot No.   | Protein ID | Peptide No. | Matched peptide sequences                 |
|------------|------------|-------------|-------------------------------------------|
| 23 (cont.) | P49235     | 23          | YGIVYVDR                                  |
| 24         | P49235     | 1           | VGSQNGVQM <sup>Ox</sup> LSPSEIPQR         |
|            |            | 2           | ILDGSNSDIGANSYHM <sup>Ox</sup> YK         |
|            |            | 3           | LLKEM <sup>Ox</sup> GM <sup>Ox</sup> DAYR |
|            |            | 4           | EM <sup>Ox</sup> GMDAYR                   |
|            |            | 5           | FSISWPR                                   |
|            |            | 6           | EGGINPDGIK                                |
|            |            | 7           | SIVEDYTYFAK                               |
|            |            | 8           | VC <sup>CAMe</sup> FDNFGDK                |
|            |            | 9           | VC <sup>CAMe</sup> FDNFGDKVK              |
|            |            | 10          | IGLAFDVM <sup>Ox</sup> GR                 |
|            |            | 11          | VPYGTSFLDK                                |
|            |            | 12          | GDYPFSMR                                  |
|            |            | 13          | ERLPFFK                                   |
|            |            | 14          | LPFFKDEQK                                 |
|            |            | 15          | DLLM <sup>Ox</sup> IM <sup>Ox</sup> K     |
|            |            | 16          | ETPLPM <sup>Ox</sup> EAALNDYK             |
|            |            | 17          | ETPLPM <sup>Ox</sup> EAALNDYKR            |
|            |            | 18          | YGIVYVDR                                  |
| 25         | P49235     | 1           | IGLAFDVM <sup>Ox</sup> GR                 |
|            |            | 2           | GDYPFSM <sup>Ox</sup> R                   |
|            |            | 3           | DLLM <sup>Ox</sup> IMK                    |
|            |            | 4           | YGIVYVDR                                  |
| 26         | BAA03433   | 1           | AAIDKLGK                                  |
|            |            | 2           | DVVD AHYK                                 |
|            |            | 3           | EAGGYEVIK                                 |

| Spot No.   | Protein ID     | Peptide No. | Matched peptide sequences             |   |             |
|------------|----------------|-------------|---------------------------------------|---|-------------|
| 26 (cont.) | BAA03433       | 4           | EGKGYFEDR                             |   |             |
|            |                | 5           | GPITDPSQLPK                           |   |             |
|            |                | 6           | HETADINTFK                            |   |             |
|            |                | 7           | EHIAAYGEGNER                          |   |             |
|            |                | 8           | AFGRDVVDAHLYK                         |   |             |
|            |                | 9           | TVKGPITDPSQLPK                        |   |             |
|            |                | 10          | GDWNGAGAHTNYSTK                       |   |             |
|            |                | 11          | LTGRHETADINTFK                        |   |             |
|            |                | 12          | HKEHIAAYGEGNER                        |   |             |
|            |                | 13          | ITEM <sup>Ox</sup> AGIVLSLDPKPIK      |   |             |
|            |                | 14          | SM <sup>Ox</sup> REAGGYEVIK           |   |             |
|            |                | 27          | BAA03433                              | 1 | DVVDAHLYK   |
|            |                |             |                                       | 2 | EAGGYEVIK   |
|            |                |             |                                       | 3 | GPITDPSQLPK |
| 4          | HETADINTFK     |             |                                       |   |             |
| 5          | HKEHIAAYGEGNER |             |                                       |   |             |
| 28         | P49235         | 1           | EGGINPDGIK                            |   |             |
|            |                | 2           | IGLAFDVM <sup>Ox</sup> GR             |   |             |
|            |                | 3           | GDYPFSM <sup>Ox</sup> R               |   |             |
|            |                | 4           | DLLM <sup>Ox</sup> IM <sup>Ox</sup> K |   |             |
|            |                | 5           | YGIVYVDR                              |   |             |
| 29         | ABG22500       | 1           | EEFGQIPR                              |   |             |
|            |                | 2           | LIHYVNK                               |   |             |
|            |                | 3           | LIHYVNKDGR                            |   |             |
|            |                | 4           | QLEFFK                                |   |             |
|            |                | 5           | TFYTDSSGR                             |   |             |

| Spot No.   | Protein ID | Peptide No. | Matched peptide sequences                 |
|------------|------------|-------------|-------------------------------------------|
| 29 (cont.) | ABG22500   | 6           | DGQIELM <sup>Ox</sup> LHR                 |
|            |            | 7           | IVETSLSANQER                              |
| 30         | EAY89931   | 1           | HEIIGDVR                                  |
|            |            | 2           | GGFYGNVFR                                 |
|            |            | 3           | ITPPLC <sup>CAMe</sup> FTK                |
| 31         | P49235     | 1           | FSISWPR                                   |
|            |            | 2           | SIVEDYTYFAK                               |
|            |            | 3           | IGLAFDVM <sup>Ox</sup> GR                 |
|            |            | 4           | VPYGTSFLDK                                |
|            |            | 5           | YGIVYVDR                                  |
|            |            | 6           | SLASSLPGQTK                               |
| 32         | BAD09434   | 1           | LSEAGLAVLR                                |
|            |            | 2           | NVSQADAALK                                |
|            |            | 3           | NVSQADAALKAGK                             |
|            |            | 4           | YVGVS LVGK                                |
|            |            | 5           | TLAVM <sup>Ox</sup> GFGK                  |
|            |            | 6           | GGVIDEDALVR                               |
|            |            | 7           | VVYTTAR                                   |
|            |            | 8           | VVYTTARGPDDL DTR                          |
|            |            | 9           | GPDDL DTR                                 |
|            |            | 10          | QIDQPGM <sup>Ox</sup> IGK                 |
| 33         | EAY86911   | 1           | VEC <sup>CAMe</sup> TIPK                  |
|            |            | 2           | TAVAAVPYGGAK                              |
|            |            | 3           | M <sup>Ox</sup> GAFTLGVNR                 |
| 34         | P49235     | 1           | LLKEM <sup>Ox</sup> GM <sup>Ox</sup> DAYR |
|            |            | 2           | FSISWPR                                   |

| Spot No.   | Protein ID                                                    | Peptide No. | Matched peptide sequences    |   |                          |
|------------|---------------------------------------------------------------|-------------|------------------------------|---|--------------------------|
| 34 (cont.) | P49235                                                        | 3           | EGGINPDGIK                   |   |                          |
|            |                                                               | 4           | SIVEDYTYFAK                  |   |                          |
|            |                                                               | 5           | VC <sup>CAMe</sup> FDNFGDKVK |   |                          |
|            |                                                               | 6           | IGLAFDVM <sup>Ox</sup> GR    |   |                          |
|            |                                                               | 7           | VPYGTSFLDK                   |   |                          |
|            |                                                               | 8           | GDYPFSM <sup>Ox</sup> R      |   |                          |
|            |                                                               | 9           | LPFFKDEQK                    |   |                          |
|            |                                                               | 10          | DLLM <sup>Ox</sup> IMK       |   |                          |
|            |                                                               | 11          | ETPLPM <sup>Ox</sup> EALNDYK |   |                          |
|            |                                                               | 12          | YGIVYVDR                     |   |                          |
|            |                                                               | 35          | AAA33498                     | 1 | TM <sup>Ox</sup> KELLGGK |
|            |                                                               |             |                              | 2 | FAYDSFR                  |
| 3          | SLFEEKLEHM <sup>Ox</sup> K                                    |             |                              |   |                          |
| 4          | GLKNDTDLTASDLK                                                |             |                              |   |                          |
| 5          | NDTDLTASDLK                                                   |             |                              |   |                          |
| 6          | ELVGQYK                                                       |             |                              |   |                          |
| 7          | EVYLSAK                                                       |             |                              |   |                          |
| 8          | GEPFSPDPK                                                     |             |                              |   |                          |
| 9          | GEPFSPDPKK                                                    |             |                              |   |                          |
| 10         | SINQITGLR                                                     |             |                              |   |                          |
| 11         | TPEDLDAM <sup>Ox</sup> K                                      |             |                              |   |                          |
| 12         | EM <sup>Ox</sup> QDIEFTVQENR                                  |             |                              |   |                          |
| 13         | IAVDM <sup>Ox</sup> VNEGLVEPR                                 |             |                              |   |                          |
| 14         | C <sup>CAMe</sup> C <sup>CAMe</sup> VSGC <sup>CAMe</sup> SGIR |             |                              |   |                          |
| 15         | LVTIGGHVLR                                                    |             |                              |   |                          |
| 16         | VLANADTPDDALTAR                                               |             |                              |   |                          |

| Spot No.   | Protein ID   | Peptide No. | Matched peptide sequences                 |
|------------|--------------|-------------|-------------------------------------------|
| 35 (cont.) | AAA33498     | 17          | NNGAQQIGLC <sup>CAMe</sup> R              |
|            |              | 18          | TEHM <sup>Ox</sup> FFASDER                |
|            |              | 19          | QM <sup>Ox</sup> IM <sup>Ox</sup> APTLELR |
|            |              | 20          | SDFEGIFR                                  |
|            |              | 21          | AM <sup>Ox</sup> DGLPVTIR                 |
|            |              | 22          | LSEVNPM <sup>Ox</sup> LGFR                |
|            |              | 23          | VGTM <sup>Ox</sup> IEIPR                  |
| 36         | NP_001046995 | 1           | TNIC <sup>CAMe</sup> YNAVDR               |
|            |              | 2           | VCCA <sup>Me</sup> QLANYLK                |
|            |              | 3           | LVITC <sup>CAMe</sup> NAVK                |
|            |              | 4           | LVITC <sup>CAMe</sup> NAVKR               |
|            |              | 5           | SLM <sup>Ox</sup> RDGTEYVTR               |
|            |              | 6           | DGTEYVTR                                  |
|            |              | 7           | VDDVINVSGHR                               |
|            |              | 8           | NQIGAF AAPDK                              |
| 37         | P12783       | 1           | RSVGTLG EADLK                             |
|            |              | 2           | SVGTLG EADLK                              |
|            |              | 3           | VILASHLGRPK                               |
|            |              | 4           | ELDYL VGAVANPK                            |
|            |              | 5           | KPFAAIVGGSK                               |
|            |              | 6           | IGVIESLLAK                                |
|            |              | 7           | GVTTIIGGDSVAAVEK                          |
| 38         | AAL99611     | 1           | AAPAGVVVPEIK                              |
|            |              | 2           | YQGYTLK                                   |
|            |              | 3           | LIM <sup>Ox</sup> ESAAR                   |
|            |              | 4           | TVSLELGGK                                 |

| Spot No.   | Protein ID   | Peptide No. | Matched peptide sequences                      |
|------------|--------------|-------------|------------------------------------------------|
| 38 (cont.) | AAL99611     | 5           | LAVFFNK                                        |
|            |              | 6           | TVDEVIEK                                       |
|            |              | 7           | YGLAAGIVTK                                     |
| 39         | EAY75202     | 1           | VSLAGHDEYIVR                                   |
|            |              | 2           | EVNGAGINSSFAVHQDVDGR                           |
|            |              | 3           | SDIFGER                                        |
|            |              | 4           | GVAFM <sup>Ox</sup> VDNC <sup>CAMe</sup> STTAR |
| 40         | Q43260       | 1           | TAVANIPYGGAK                                   |
|            |              | 2           | VIAISDVTGAVK                                   |
|            |              | 3           | M <sup>Ox</sup> GAFTLGVNR                      |
| 41         | Q43260       | 1           | M <sup>Ox</sup> GAFTLGVNR                      |
|            |              | 2           | TAVANIPYGGAK                                   |
|            |              | 3           | VIAISDVTGAVK                                   |
|            |              | 4           | SLIPFR                                         |
|            |              | 5           | LLGLDSKLEK                                     |
|            |              | 6           | M <sup>Ox</sup> NALAATSR                       |
|            |              | 7           | NVDGLDIAQLVK                                   |
|            |              | 8           | DDGTLASYVGFR                                   |
|            |              | 9           | VEC <sup>CAMe</sup> TIPK                       |
|            |              | 10          | EIKVEC <sup>CAMe</sup> TIPK                    |
| 42         | NP_001063777 | 1           | FFVGGNWK                                       |
|            |              | 2           | IEVSAQNVWIGK                                   |
|            |              | 3           | KAAYALSQNVK                                    |
|            |              | 4           | AAYALSQNVK                                     |
|            |              | 5           | VATPEQAQEVHAAVR                                |
| 43         | CAE18179     | 1           | VSM <sup>Ox</sup> DGNFLQNALSK                  |

| Spot No.   | Protein ID             | Peptide No. | Matched peptide sequences                 |
|------------|------------------------|-------------|-------------------------------------------|
| 43 (cont.) | CAE18179               | 2           | QVDDFTSR                                  |
|            |                        | 3           | LLEIHRK                                   |
|            |                        | 4           | M <sup>Ox</sup> M <sup>Ox</sup> EINKEENIR |
|            |                        | 5           | QYGTSLSEHK                                |
|            |                        | 6           | QYGTSLSEHKR                               |
|            |                        | 7           | HLQDSHGITTIR                              |
|            |                        | 8           | HLQDSHGITTIRK                             |
|            |                        | 9           | VAVVYFR                                   |
|            |                        | 10          | C <sup>CAMe</sup> PSISYHLVGTK             |
|            |                        | 11          | C <sup>CAMe</sup> PSISYHLVGTKK            |
|            |                        | 12          | KIQQELAKPNVLER                            |
|            |                        | 13          | IQQELAKPNVLER                             |
|            |                        | 14          | FLKSEEIDK                                 |
|            |                        | 15          | SEEIDKVR                                  |
|            |                        | 16          | EGGNNIYGLDLR                              |
|            |                        | 17          | ASPAYLVR                                  |
|            |                        | 44          | NP_001062330                              |
| 2          | VDYGM <sup>Ox</sup> FR |             |                                           |
| 3          | VYDSFTVER              |             |                                           |
| 45         | NP_001105895           | 1           | IALQLVR                                   |
|            |                        | 2           | TLIFPAANK                                 |
|            |                        | 3           | ILEFIAVGK                                 |
|            |                        | 4           | YLLNEQLK                                  |
|            |                        | 5           | LLQALIENR                                 |
|            |                        | 6           | TLIFPAANKR                                |
|            |                        | 7           | DFDELASNVK                                |

| Spot No.   | Protein ID   | Petide No. | Matched peptide sequences         |
|------------|--------------|------------|-----------------------------------|
| 45 (cont.) | NP_001105895 | 8          | ESAQIAHTVGR                       |
|            |              | 9          | IIC <sup>CAMe</sup> LSGPPGVGK     |
|            |              | 10         | ATSFEVISTLR                       |
|            |              | 11         | LADFGAAISGANK                     |
|            |              | 12         | DLAM <sup>Ox</sup> TGEVTLTGR      |
| 46         | Q9M4U5       | 1          | KSDSALM <sup>Ox</sup> YVK         |
|            |              | 2          | EFELSHTSK                         |
|            |              | 3          | TTSVFFSGYK                        |
|            |              | 4          | SSLGLEKK                          |
|            |              | 5          | KGATHVATPHPAK                     |
|            |              | 6          | GATHVATPHPAK                      |
|            |              | 7          | TFNSEM <sup>Ox</sup> ALQAHSK      |
| 47         | NP_001105372 | 1          | VLITTDLLAR                        |
|            |              | 2          | DELTLEGIK                         |
|            |              | 3          | FM <sup>Ox</sup> NKPVR            |
|            |              | 4          | ALGDYLGVK                         |
|            |              | 5          | ELAQQIEK                          |
|            |              | 6          | KFM <sup>Ox</sup> NKPVR           |
|            |              | 7          | QSLRPDNIK                         |
|            |              | 8          | KGVAINFVTR                        |
|            |              | 9          | VHAC <sup>CAMe</sup> VGGTSVR      |
|            |              | 10         | RDELTLEGIK                        |
|            |              | 11         | GLDVIQQAQSGTGK                    |
|            |              | 12         | ILASGVHVVVGTTPGR                  |
|            |              | 13         | DHTVSATHGDM <sup>Ox</sup> DQNTR   |
|            |              | 14         | SRDHTVSATHGDM <sup>Ox</sup> DQNTR |



| Spot No. | Protein ID | Peptide No. | Matched peptide sequences  |
|----------|------------|-------------|----------------------------|
| 48       | AAN78327   | 1           | QLPDKAIDLIDEAGSR           |
|          |            | 2           | AIDLIDEAGSR                |
|          |            | 3           | LDM <sup>Ox</sup> SEYMER   |
| 49       | AAG34834   | 1           | FGETPVAK                   |
|          |            | 2           | KIQAYWASAK                 |
|          |            | 3           | ETHAAVLNLEK                |
|          |            | 4           | GELLSSNPVHK                |
|          |            | 5           | EVLQPQDEAVAYAK             |
| 50       | AAL57038   | 1           | FVPVTVEADPK                |
|          |            | 2           | LSALLAAEGR                 |
|          |            | 3           | LSALLAAEGRDSVR             |
|          |            | 4           | TLIDKGYLPVK                |
|          |            | 5           | GYLPVKEER                  |
|          |            | 6           | LVPTATASLHGVVQADR          |
|          |            | 7           | VGTELVGEQLER               |
|          |            | 8           | AAIDRLFGTK                 |
| 51       | ABM97609   | 1           | M <sup>Ox</sup> LAVFDPTVAK |
|          |            | 2           | LAVFDPTVAK                 |
|          |            | 3           | QHYGLSK                    |
|          |            | 4           | DRGPVPASQVVR               |
|          |            | 5           | GPVPASQVVR                 |
|          |            | 6           | KQDASIPR                   |
|          |            | 7           | VGSAADWSNQF                |
| 52       | P49087     | 1           | SGDVYIPR                   |
|          |            | 2           | LAADTPLLTGQR               |
|          |            | 3           | TVISQALSK                  |

| Spot No.   | Protein ID                                                   | Peptide No. | Matched peptide sequences          |   |              |
|------------|--------------------------------------------------------------|-------------|------------------------------------|---|--------------|
| 52 (cont.) | P49087                                                       | 4           | RTTLVANTSNM <sup>Ox</sup> PVAAR    |   |              |
|            |                                                              | 5           | TTLVANTSNM <sup>Ox</sup> PVAAR     |   |              |
|            |                                                              | 6           | LASFYER                            |   |              |
|            |                                                              | 7           | ALESFYEK                           |   |              |
|            |                                                              | 8           | DALAESDKITLETAK                    |   |              |
|            |                                                              | 9           | LGDLFYR                            |   |              |
|            |                                                              | 10          | LYDDLTTGFR                         |   |              |
|            |                                                              | 11          | NLEDEAR                            |   |              |
|            |                                                              | 53          | P49087                             | 1 | SGDVYIPR     |
|            |                                                              |             |                                    | 2 | LAADTPLLTGQR |
|            |                                                              |             |                                    | 3 | TVISQALSK    |
| 4          | RTTLVANTSNM <sup>Ox</sup> PVAAR                              |             |                                    |   |              |
| 5          | TTLVANTSNM <sup>Ox</sup> PVAAR                               |             |                                    |   |              |
| 6          | DM <sup>Ox</sup> GYNVSM <sup>Ox</sup> M <sup>Ox</sup> ADSTSR |             |                                    |   |              |
| 7          | LASFYER                                                      |             |                                    |   |              |
| 8          | VKC <sup>CAMe</sup> LGSPDR                                   |             |                                    |   |              |
| 9          | ALESFYEK                                                     |             |                                    |   |              |
| 10         | DALAESDKITLETAK                                              |             |                                    |   |              |
| 11         | FC <sup>CAMe</sup> PFYK                                      |             |                                    |   |              |
| 12         | AAGTDGHKITYSVIK                                              |             |                                    |   |              |
| 13         | ITYSVIK                                                      |             |                                    |   |              |
| 14         | LGDLFYR                                                      |             |                                    |   |              |
| 15         | LYDDLTTGFR                                                   |             |                                    |   |              |
| 16         | NLEDEAR                                                      |             |                                    |   |              |
| 54         | BAC79943                                                     | 1           | GSC <sup>CAMe</sup> HIGGNISTNAGGLR |   |              |
|            |                                                              | 2           | LEAFLLR                            |   |              |

| Spot No.   | Protein ID   | Peptide No. | Matched peptide sequences               |
|------------|--------------|-------------|-----------------------------------------|
| 54 (cont.) | BAC79943     | 3           | IREGISEASVK                             |
|            |              | 4           | EGISEASVK                               |
|            |              | 5           | LYDIVEEM <sup>Ox</sup> R                |
|            |              | 6           | GSISAEHGLGLM <sup>Ox</sup> K            |
| 55         | NP_001042770 | 1           | LNGFPC <sup>CAMe</sup> K                |
|            |              | 2           | IDYAPGGQNPPHTHPR                        |
|            |              | 3           | GLVHFQQNR                               |
| 56         | NP_001042770 | 1           | LNGFPC <sup>CAMe</sup> K                |
|            |              | 2           | IDYAPGGQNPPHTHPR                        |
|            |              | 3           | GLVHFQQNR                               |
| 57         | EAY76673     | 1           | AFGDEEKR                                |
|            |              | 2           | M <sup>Ox</sup> M <sup>Ox</sup> SPFLTQR |
|            |              | 3           | KVPANEEPIM <sup>Ox</sup> K              |
|            |              | 4           | VPANEEPIM <sup>Ox</sup> K               |
| 58         | AAM93677     | 1           | ILLDTSK                                 |
|            |              | 2           | LEADEHPSTVK                             |
|            |              | 3           | LQTQNIHSTPTASK                          |
| 59         | AAC12715     | 1           | AQADIWR                                 |
|            |              | 2           | LLAASGVFTVDK                            |
|            |              | 3           | C <sup>CAMe</sup> TVLAPPK               |
|            |              | 4           | ILKEFGAR                                |
| 60         | NP_001105323 | 1           | YVSNLER                                 |
|            |              | 2           | FQELGLEK                                |
|            |              | 3           | SLSALQGALR                              |
|            |              | 4           | ISQGGLQR                                |
|            |              | 5           | GWGDC <sup>CAMe</sup> AKR               |

| Spot No.   | Protein ID   | Pptide No. | Matched peptide sequences                                   |
|------------|--------------|------------|-------------------------------------------------------------|
| 60 (cont.) | NP_001105323 | 6          | WISAQM <sup>Ox</sup> NR                                     |
|            |              | 7          | DGAFEDVLR                                                   |
|            |              | 8          | VPEYLQFK                                                    |
|            |              | 9          | QC <sup>CAMe</sup> GLDITPK                                  |
|            |              | 10         | IEEKYTWK                                                    |
|            |              | 11         | GM <sup>Ox</sup> TMM <sup>Ox</sup> LNDR                     |
|            |              | 12         | AM <sup>Ox</sup> ENEMLLR                                    |
|            |              | 13         | DKEEQAEFK                                                   |
|            |              | 14         | SLSALQGALRK                                                 |
|            |              | 15         | YLEM <sup>Ox</sup> LYALK                                    |
|            |              | 16         | NKPIIFSMAR                                                  |
|            |              | 17         | YPNSDLYWK                                                   |
|            |              | 18         | NKPIIFSM <sup>Ox</sup> AR                                   |
|            |              | 19         | SINGVQFLNR                                                  |
|            |              | 20         | VVHGIDVFDPK                                                 |
|            |              | 21         | NLTGLVELYGR                                                 |
|            |              | 22         | LKDGFEDVLR                                                  |
|            |              | 23         | IKQC <sup>CAMe</sup> GLDITPK                                |
|            |              | 24         | RYLEM <sup>Ox</sup> LYALK                                   |
|            |              | 25         | VLGTEHC <sup>CAMe</sup> HILR                                |
|            |              | 26         | VNVSELAVEELR                                                |
|            |              | 27         | LLPDATGTTC <sup>CAMe</sup> GQR                              |
|            |              | 28         | TKYPNSDLYWK                                                 |
|            |              | 29         | M <sup>Ox</sup> GVTHC <sup>CAMe</sup> TIAHALEK              |
|            |              | 30         | TM <sup>Ox</sup> ASTVPLAVEGEPSSK                            |
|            |              | 31         | AHNYKGM <sup>Ox</sup> TM <sup>Ox</sup> M <sup>Ox</sup> LNDR |

| Spot No.   | Protein ID   | Peptide No. | Matched peptide sequences         |
|------------|--------------|-------------|-----------------------------------|
| 60 (cont.) | NP_001105323 | 32          | LLPDATGTTC <sup>CAMe</sup> GQRLEK |
|            |              | 33          | IGDSLSAHPNELVAVFTR                |
| 61         | AAL73979     | 1           | ASHIVGYPR                         |
|            |              | 2           | GNATVPAM <sup>Ox</sup> EMTK       |
|            |              | 3           | FTYASHK                           |
|            |              | 4           | YLFAGVVDGR                        |
|            |              | 5           | SWLAFAAQK                         |
|            |              | 6           | VVEVNALAK                         |
|            |              | 7           | DEAYFAANAAAQASR                   |
|            |              | 8           | KISEEEYISAIK                      |
|            |              | 9           | ISEEEYISAIK                       |
|            |              | 10          | EGLPLRK                           |
|            |              | 11          | SDEKLLSVFR                        |
|            |              | 12          | YGAGIGPGVYDIHSPR                  |
|            |              | 13          | KYTEVKPALTNM <sup>Ox</sup> VSATK  |
|            |              | 14          | YTEVKPALTNM <sup>Ox</sup> VSATK   |
| 62         | AAO62313     | 1           | NLFFSTDIEK                        |
|            |              | 2           | AADLTYWESAAR                      |
|            |              | 3           | M <sup>Ox</sup> IADVSKSDK         |
|            |              | 4           | SDKIVVEK                          |
|            |              | 5           | DVYAHWVPEDR                       |
|            |              | 6           | IITNLWSAELSK                      |
|            |              | 7           | LAANAFLAQR                        |
|            |              | 8           | VVSSMFNTVSGK                      |
|            |              | 9           | VVSSMFNTVSGKK                     |
|            |              | 10          | KIAVLGFAFK                        |

| Spot No.   | Protein ID   | Peptide No. | Matched peptide sequences                    |
|------------|--------------|-------------|----------------------------------------------|
| 62 (cont.) | AAO62313     | 11          | IAVLGFAPK                                    |
|            |              | 12          | DTGDTRETPAIDVC <sup>CAMe</sup> K             |
|            |              | 13          | ETPAIDVCK                                    |
| 63         | NP_001050672 | 1           | VLKDDAVEEK                                   |
|            |              | 2           | GM <sup>Ox</sup> DKILQSTGR                   |
|            |              | 3           | SLHIDNPAAK                                   |
|            |              | 4           | IHPM <sup>Ox</sup> TIIAGYR                   |
|            |              | 5           | SDLM <sup>Ox</sup> NIAM <sup>Ox</sup> TTLSSK |
|            |              | 6           | KIGLGQPK                                     |
|            |              | 7           | ILVANTAM <sup>Ox</sup> DTDK                  |
|            |              | 8           | ILVANTAM <sup>Ox</sup> DTDKVK                |
|            |              | 9           | GASEHVLDEAER                                 |
|            |              | 10          | VDEIITC <sup>CAMe</sup> APR                  |
| 64         | P54411       | 1           | LMVELSR                                      |
|            |              | 2           | RALAEIAVK                                    |
|            |              | 3           | ALAEIAVK                                     |
|            |              | 4           | AVLAVADLER                                   |
|            |              | 5           | AVLAVADLERK                                  |
|            |              | 6           | KDVNLDLIK                                    |
|            |              | 7           | DVNLDLIK                                     |
|            |              | 8           | DVNLDLIKVEGK                                 |
|            |              | 9           | HKVDIDTVEK                                   |
|            |              | 10          | VDIDTVEK                                     |
|            |              | 11          | YFDEM <sup>Ox</sup> VQK                      |
|            |              | 12          | DRM <sup>Ox</sup> LYIEK                      |
|            |              | 13          | M <sup>Ox</sup> LYIEK                        |

| Spot No.   | Protein ID   | Peptide No. | Matched peptide sequences                     |
|------------|--------------|-------------|-----------------------------------------------|
| 64 (cont.) | P54411       | 14          | AVTIFIR                                       |
|            |              | 15          | M <sup>Ox</sup> M <sup>Ox</sup> IEETKR        |
|            |              | 16          | SIHDALC <sup>CAMe</sup> VAR                   |
|            |              | 17          | HPGVEQYAIR                                    |
|            |              | 18          | QQQILLATQVVK                                  |
| 65         | NP_001053409 | 1           | KIEEQLEK                                      |
|            |              | 2           | IEEQLEK                                       |
|            |              | 3           | GEEVLKAEEM <sup>Ox</sup> AAK                  |
|            |              | 4           | KLIGC <sup>CAMe</sup> FGA                     |
| 66         | NP_001058379 | 1           | THFHDC <sup>CAMe</sup> FVR                    |
|            |              | 2           | DAAPNLTLR                                     |
| 67         | NP_001062292 | 1           | DIC <sup>CAMe</sup> QDGGIFKK                  |
|            |              | 2           | TVTEIGDDKK                                    |
|            |              | 3           | KEEGNALFK                                     |
|            |              | 4           | EEGNALFK                                      |
|            |              | 5           | VTC <sup>CAMe</sup> NLNNAAC <sup>CAMe</sup> K |
|            |              | 6           | VLELDSQNVK                                    |
|            |              | 7           | ALEIDPDNR                                     |
|            |              | 8           | ALEIDPDNRDVK                                  |
|            |              | 9           | FYSNM <sup>Ox</sup> FAK                       |
| 68         | AAT40531     | 1           | LLVTDEAR                                      |
|            |              | 2           | LLVTDEARK                                     |
|            |              | 3           | KFDDEIR                                       |
| 69         | AAU93346     | 1           | AGFAGDDAPR                                    |
|            |              | 2           | DAYVGDEAQSQR                                  |
|            |              | 3           | DLTDSL <sup>Ox</sup> M <sup>Ox</sup> K        |

---

| <b>Spot No.</b> | <b>Protein ID</b> | <b>Peptide No.</b> | <b>Matched peptide sequences</b> |
|-----------------|-------------------|--------------------|----------------------------------|
| 69 (cont.)      | AAU93346          | 4                  | GYSFTTSAER                       |
|                 |                   | 5                  | EITSLAPSSM <sup>Ox</sup> K       |
|                 |                   | 6                  | IKVVAPPER                        |
|                 |                   | 7                  | EEYDESGPAIVHR                    |
| 70              | P02580            | 1                  | DSYVGDEAQSKR                     |
|                 |                   | 2                  | AGFAGDDAPR                       |
|                 |                   | 3                  | EITALAPSSM <sup>Ox</sup> K       |

---
